# Supplementary material for: New highly efficient electrochemical synthesis of dispersed Ag2O particles in the vicinity of the cathode with controllable size and shape
Source: Royal Society of Chemistry journal article supplement (doi:10.1039/c5tc01274k), 2015-01-01
Supplement: c5tc01274k1.pdf [file c5tc01274k1.pdf]

## New Highly efficient electrochemical synthesis of dispersed Ag<sub>2</sub>O particles in the vicinity of the cathode with controllable size and shape

Quoc-Thai Pham,<sup>a,b</sup> Bui The Huy,<sup>a</sup> Yong-Ill Lee <sup>\*,a</sup>

<sup>a</sup>Anastro Laboratory, Department of Chemistry, Changwon National University, Changwon 641-773, Korea.

<sup>b</sup>Faculty of Chemical Engineering, Industrial University of Hochiminh City, Viet Nam.

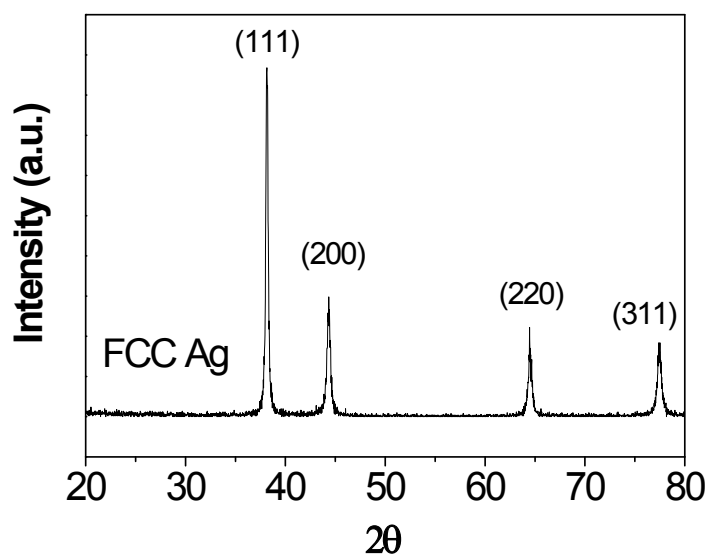

**Fig. S1** XRD pattern of the deposited Ag powder. All the diffraction peaks of the deposited Ag sample were assigned to a FCC Ag lattice (JCPDS 893722).

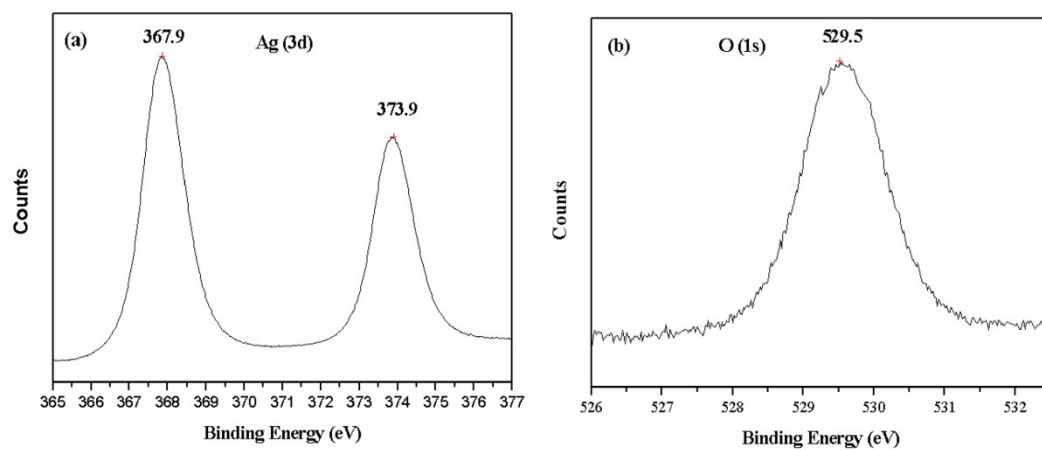

**Fig. S2** XPS spectra of (a) Ag (3d), and (b) O (1s) for Ag<sub>2</sub>O hexapods.

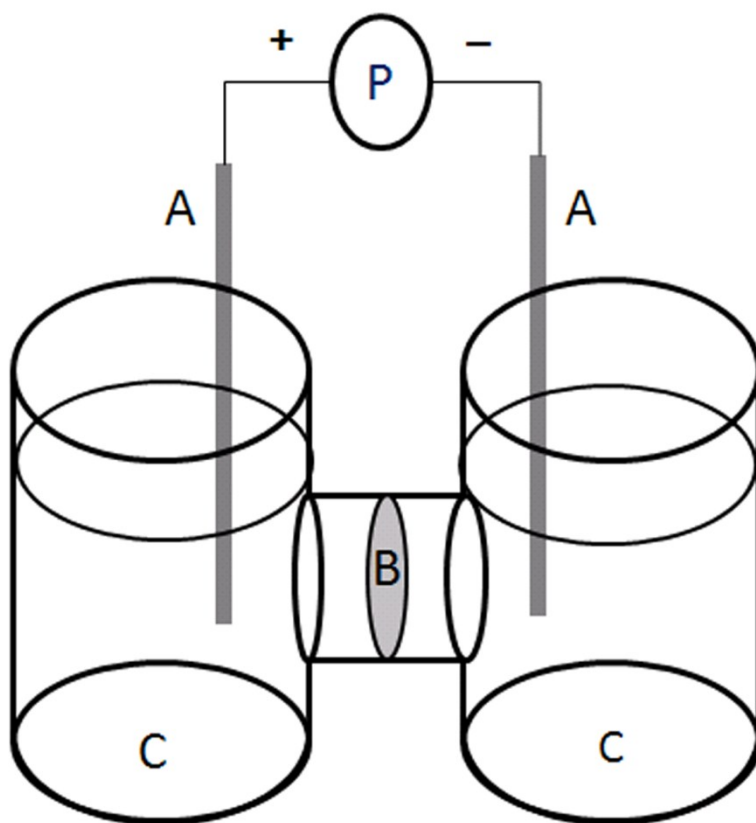

**Fig. S3** Schematic view of apparatus for electrochemical synthesis of dispersed silver oxide particles. A is the silver electrode, B glass filter (G4), C glass chamber and P direct current power supply (Agilent, E3641, 35 V, 0.8 A). Total volume of aqueous solution in the chamber containing  $\text{AgNO}_3$  and  $\text{Na}_2\text{SO}_4$  is 30 mL.
